# Supplementary material
Source: PubMed Central journal article supplement (PMC5286357)
Supplement: EMBR-18-334-s001.pdf [file EMBR-18-334-s001.pdf]

# Appendix

Table of Contents

Appendix Table S1: Primers used in quantitative PCR..... 2

## Appendix Table S1

### Primers used in quantitative PCR

| Primer name   | Sequence                |
|---------------|-------------------------|
| qhAuroraA_1_F | GGCAACCAGTGTACCTCATCC   |
| qhAuroraA_1_R | TTTGATGCCAGTTCCTCCTCAG  |
| qhAuroraA_2_F | TGGGTGGTCAGTACATGCTCC   |
| qhAuroraA_2_R | ACTCCAAGGCTCCAGAGATCC   |
| qhGAPDH_1_F   | GGCTGAGAACGGGAAGCTTG    |
| qhGAPDH_1_R   | ACTCCACGACGTACTIONCAGCG |
